# Supplementary material
Source: publisher figshare collection journal article supplement (https://acs.figshare.com/ndownloader/files/3952519)
Supplement: Supplementary file 1 [file 3952519]

## Supporting Information for:

# Ping-Pong Protons: How Hydrogen Bonding Networks Facilitate Heterolytic Bond Cleavages in Peptide Radical Cations

*Konstantin O. Zhurov,<sup>1</sup> Matthew D. Wodrich,<sup>1,2</sup> Clémence Corminboeuf,<sup>2</sup>*

*Yury O. Tsybin<sup>1\*</sup>*

<sup>1</sup>Biomolecular Mass Spectrometry Laboratory, Ecole Polytechnique Fédérale de  
Lausanne, 1015 Lausanne, Switzerland

<sup>2</sup>Laboratory for Computational Molecular Design, Ecole Polytechnique Fédérale  
de Lausanne, 1015 Lausanne, Switzerland

**Table S1.** Energies of relevant species. Absolute electronic energies, computed at the  $\omega$ B97X-D/6-31G(d) level, given in hartree. Relative energies (in comparison to first transition state barrier height) given in kcal/mol.

| Species                                         | Electronic Energy | Relative Energy |
|-------------------------------------------------|-------------------|-----------------|
| <b>Figure 1</b>                                 |                   |                 |
| c4/z2 Cleavage TS                               | -1734.104771      | 0.00            |
| c4/z2 Cleavage Products                         | -1734.126637      | -13.72          |
|                                                 |                   |                 |
| <b>Figure2</b>                                  |                   |                 |
| c4/z2 Cleavage TS                               | -1734.128694      | 0.00            |
| c4/z2 Cleavage Products                         | -1734.146870      | -11.41          |
| 1 <sup>st</sup> Proton Transfer TS              | -1734.145986      | -10.85          |
| 1 <sup>st</sup> Proton Transfer Products        | -1734.148541      | -12.45          |
|                                                 |                   |                 |
| <b>Figure 3</b>                                 |                   |                 |
| c3/z3 Cleavage TS                               | -1734.127586      | 0.00            |
| c3/z3 Cleavage Products                         | -1734.128318      | -0.46           |
| 1 <sup>st</sup> Proton Transfer TS (H44 to O32) | -1734.127159      | 0.27            |
| 1 <sup>st</sup> Proton Transfer Products        | -1734.137502      | -6.22           |
|                                                 |                   |                 |
| <b>Figure 4</b>                                 |                   |                 |
| c3/z3 Cleavage TS                               | -1734.078510      | 0.00            |
| c3/z3 Cleavage Products                         | -1734.093216      | -9.23           |
| 1 <sup>st</sup> Proton Transfer TS (H3 to O12)  | -1734.089965      | -7.19           |
| 1 <sup>st</sup> Proton Transfer Products        | -1734.095743      | -10.81          |
| 2 <sup>nd</sup> Proton Transfer TS (H14 to O22) | -1734.086236      | -4.85           |
| 2 <sup>nd</sup> Proton Transfer Products        | -1734.091955      | -8.44           |
| 3 <sup>rd</sup> Proton Transfer TS (H24 to O32) | -1734.088383      | -6.20           |
| 3 <sup>rd</sup> Proton Transfer Products        | -1734.099397      | -13.11          |
|                                                 |                   |                 |
| <b>Figure 5</b>                                 |                   |                 |
| c2/z2 Cleavage TS                               | -1239.574084      | 0.00            |
| c2/z2 Cleavage Products                         | -1239.596992      | -14.37          |
| 1 <sup>st</sup> Proton Transfer TS (H4 to O38)  | -1239.596836      | -14.28          |
| 1 <sup>st</sup> Proton Transfer Products        | -1239.636658      | -39.27          |
|                                                 |                   |                 |
| <b>Figure 6</b>                                 |                   |                 |
| c3/z2 Cleavage TS                               | -1486.80329       | 0.00            |
| c3/z2 Cleavage Products                         | -1486.849489      | -28.99          |
| 1 <sup>st</sup> Proton Transfer TS (H44 to N33) | -1486.839048      | -22.44          |
| 1 <sup>st</sup> Proton Transfer Products        | -1486.852781      | -31.06          |
|                                                 |                   |                 |
| <b>Figure 7</b>                                 |                   |                 |
| c3/z2 Cleavage TS                               | -1486.826299      | 0.00            |
| c3/z2 Cleavage Products                         | -1486.850009      | -14.88          |
| 1 <sup>st</sup> Proton Transfer TS (H3 to O12)  | -1486.845132      | -11.82          |
| 1 <sup>st</sup> Proton Transfer Products        | -1486.851214      | -15.63          |
| 2 <sup>nd</sup> Proton Transfer TS (H14 to O49) | -1486.844601      | -11.48          |
| 2 <sup>nd</sup> Proton Transfer Products        | -1486.854263      | -17.55          |
